# Supplementary material for: LncRNA-IMAT1 Promotes Invasion of Meningiomas by Suppressing KLF4/hsa-miR22-3p/Snai1 Pathway
Source: PubMed Central journal article supplement — Mol Cells. 2022 May 30;45(6):388–402. doi: 10.14348/molcells.2022.2232 (PMC9200663; doi:10.14348/molcells.2022.2232), 2022-05-30
Supplement: molce-45-6-388-supple1.pdf [file molce-45-6-388-supple1.pdf]

**Supplementary Table S1.** The primers used in this study

| Classification                        | Name                           | Sequence (5'-3')                                      |
|---------------------------------------|--------------------------------|-------------------------------------------------------|
| The siRNA and a nonsense to IMAT1     | siRNA-IMAT1                    | GCGCAGGCCCCAGGAAGGCG                                  |
|                                       | nonsense-IMAT1                 | GGTAGGTGGGCAGCTGAGA                                   |
| Construction of overexpression vector | IMAT1-forward                  | GGAATCTTAATGTGGCAAGGCACAGA                            |
|                                       | IMAT1-reverse                  | CGGGATCC CTACGCGCTTCTGGGCCGCACG                       |
|                                       | KLF4-forward                   | GGAATTCGCCACCATGAGGCAGCCACCTGGCG                      |
|                                       | KLF4-reverse                   | CGGGATCCTTAAAAATGCCTTTCATGTGTAAGG                     |
| Construction of luciferase vector     | miR22-3p-promoter-forward      | GGGGTACCCTTCGCCACGACTCCCGTCCCAGA                      |
|                                       | miR22-3p-promoter-reverse      | CCCAAGCTTGGCGCTGACGCGGAGGGCTGGGCC                     |
|                                       | 3'UTR-Snai1-forward            | GCTCTAGATTCCCATGGCCATTTCTGTGGAGG                      |
|                                       | 3'UTR-Snai1-reverse            | GCTCTAGACCTGAGTGGGGTGGGAGCTT                          |
| RNA synthesis                         | hsa-miR-22-3p mimic            | AAGCUGCCAGUUGAAGAACUGUTT                              |
|                                       | hsa-miR-22-3p inhibitor        | ACAGUUCUUAACUGGCAGCUUTT                               |
|                                       | hsa-miR-22-3p NC               | CGUGCGUUACAUAACGAGAUGATT                              |
| RT-PCR in ChIP-PCR                    | ChIP-PCR forward               | CTGCGTGACCGGGTCCGCAGC                                 |
|                                       | ChIP-PCR reverse               | GTGCTGGGTGTGGGGGTT                                    |
| RT-qPCR                               | IMAT1-RT-qPCR forward          | TCCCCACGACCCTCAGCCTGCC                                |
|                                       | IMAT1-RT-qPCR reverse          | TCCGCCAGGACCTGCGGAGGC                                 |
|                                       | KLF4-RT-qPCR forward           | GCGGGCTGCGGCAAAACCTACAC                               |
|                                       | KLF4-RT-qPCR reverse           | AGCGGGCGAATTTCCATCCACAGC                              |
|                                       | Snai1-RT-qPCR forward          | AAGCCTAACTACAGCGAGCTG                                 |
|                                       | Snai1-RT-qPCR reverse          | AGCGAGGCGGTGGGGTTGAGG                                 |
|                                       | $\beta$ -actin-RT-qPCR forward | CCTGTACGCCAACACAGTGC                                  |
|                                       | $\beta$ -actin-RT-qPCR reverse | ATACTCCTGCTTGCTGATCC                                  |
|                                       | U6-RT-qPCR forward             | GTGCTCGCTTCGGCAGCACAT                                 |
|                                       | U6-RT-qPCR reverse             | TACCTTGCGAAGTGCTTAAAC                                 |
| Specific primers                      | miR22-3p-RT-qPCR forward       | GCCGGCGCCCAGCTCTGGCTC                                 |
|                                       | miR22-3p-RT-qPCR reverse       | AAGCTGCCAGTTGAAGAAGTGT                                |
| The probes used for FISH              | hsa-miR-22-3p RT primer        | GTCGTATCCAGTGC GTGTCGTGGAGTCGGCAATTGCACTGGATACGAACAGT |
|                                       | probe-IMAT1-FISH               | TTCCGCCACGACTCCCGTCCCAGACTC(5'/3' Cy3 modification)   |
|                                       | probe-hsa-miR-22-3p-FISH       | TGTCAAGAAGTTGACCGTCGAA(5'/3' DIG modification)        |
